# Supplementary figures and images for: Deciphering and engineering chromodomain-methyllysine peptide recognition
Source: PubMed Central journal article supplement — Sci Adv. 2018 Nov 7;4(11):eaau1447. doi: 10.1126/sciadv.aau1447 (PMC6221542; doi:10.1126/sciadv.aau1447), 2018-11-07

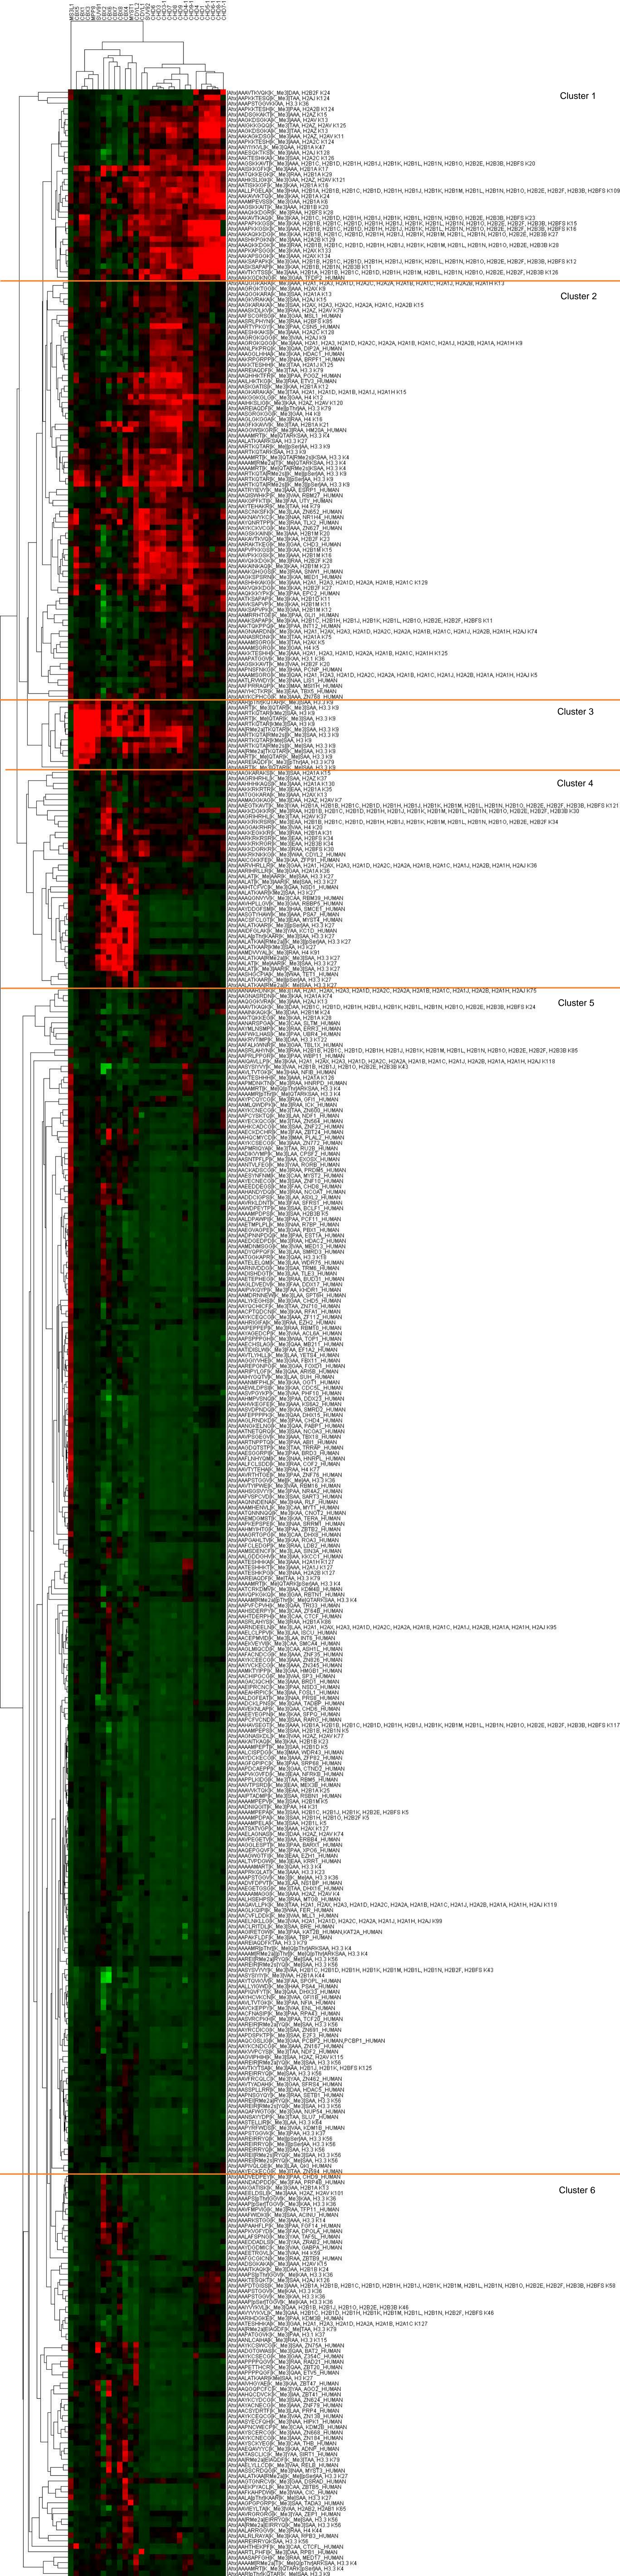

Cluster 1

Cluster 2

Cluster 3

Cluster 4

Cluster 5

Cluster 6

Supplement: aau1447_Figure_S2.pdf [file aau1447_Figure_S2.pdf]
